# Supplementary material for: A Randomized Controlled Trial of Three Advanced Wound Dressings in Split-Thickness Skin Grafting Donor Sites—A Personalized Approach?
Source: MDPI journal article supplement (doi:10.3390/jpm12091395), 2022-08-27
Supplement: s1 [file s1]

## Supplementary Material

### Figures:

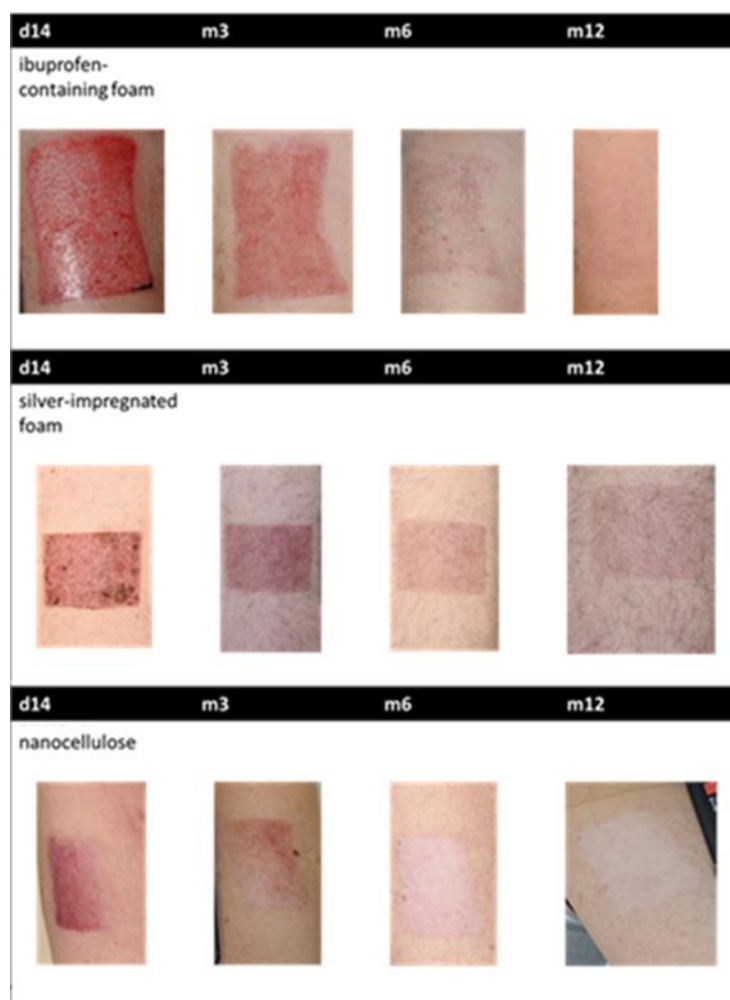

**Figure S1.** Scar colour change of ibuprofen-containing foam, silver-impregnated foam and nanocellulose in a time-dependent-manner over 12 months. d14, 14 days after dressing application; m3 / m6 / m12, 3 / 6 / 12 months following STSG donor site collection.

### Tables:

**Table S1.** PSAS scores surveyed by patients and VSS scores surveyed by observers after 3, 6 and 12 months. PSAS, Patient Scar Assessment Scale; VSS, Vancouver Scar Scale; IR, interquartile range.

|                                  | nanocellulose | silver-impregnated foam | ibuprofen-containing foam |
|----------------------------------|---------------|-------------------------|---------------------------|
| <b>PSAS patient, median (IR)</b> |               |                         |                           |
| Pain 3 months                    | 1 (0)         | 1 (0)                   | 1 (1)                     |
| Pain 6 months                    | 1 (0)         | 1 (0)                   | 1 (0)                     |
| Pain 12 months                   | 1 (0)         | 1 (0)                   | 1 (0)                     |
| Itching 3 months                 | 1 (0)         | 1 (4)                   | 1 (0)                     |

|                                  |          |         |         |
|----------------------------------|----------|---------|---------|
| Itching 6 months                 | 1 (0)    | 1 (1)   | 1 (0)   |
| Itching 12 months                | 1 (0)    | 1 (1)   | 1 (0)   |
| Colour 3 months                  | 6 (2.5)  | 7 (3)   | 4 (5)   |
| Colour 6 months                  | 3 (1.75) | 5 (3.5) | 3.5 (3) |
| Colour 12 months                 | 2 (2)    | 3 (4)   | 2(1)    |
| Stiffness 3 months               | 1 (0)    | 1 (0)   | 1 (0)   |
| Stiffness 6 months               | 1 (0)    | 1 (0)   | 1 (0)   |
| Stiffness 12 months              | 1 (0)    | 1 (0)   | 1 (0)   |
| Thickness 3 months               | 1 (0)    | 1 (1)   | 1 (0)   |
| Thickness 6 months               | 1 (0)    | 1 (1)   | 1 (0)   |
| Thickness12 months               | 1 (0)    | 1 (0)   | 1 (0)   |
| Irregularity 3 months            | 1 (0)    | 1 (0)   | 1 (0)   |
| Irregularity 6 months            | 1 (0)    | 1 (0)   | 1 (0)   |
| Irregularity 12 months           | 1 (0)    | 1 (0)   | 1 (0)   |
| <b>VSS observer, median (IR)</b> |          |         |         |
| Vascularity 3 months             | 1 (3)    | 1 (2)   | 1 (1)   |
| Vascularity 6 months             | 0 (1)    | 0 (1)   | 1 (1)   |
| Vascularity 12 months            | 0 (1)    | 0 (1)   | 0 (0)   |
| Pigmentation 3 months            | 2 (2)    | 2 (1)   | 2 (2)   |
| Pigmentation 6 months            | 0 (1)    | 1 (2)   | 2 (2)   |
| Pigmentation 12 months           | 0 (1)    | 0 (1)   | 0 (1)   |
| Pliability 3 months              | 0 (1)    | 1 (2)   | 0 (0)   |
| Pliability 6 months              | 0 (1)    | 0 (1)   | 0 (0)   |
| Pliability 12 months             | 0 (1)    | 0 (1)   | 0 (0)   |
| Height 3 months                  | 0 (0)    | 0 (1)   | 0 (1)   |
| Height 6 months                  | 0 (0)    | 0 (1)   | 0 (0)   |
| Height 12 months                 | 0 (0)    | 0 (0)   | 0 (0)   |

---
